# Supplementary material for: Amblyomma aureolatum Genetic Diversity and Population Dynamics Are Not Related to Spotted Fever Epidemiological Scenarios in Brazil
Source: MDPI journal article supplement (doi:10.3390/pathogens10091146), 2021-09-06
Supplement: s1 [file s1]

**Table S5.** Collection data for *Amblyomma aureolatum* samples analyzed from Brazil.

| State             | Year collection | Biome               | Localities             | Host                    | Tick sex             |
|-------------------|-----------------|---------------------|------------------------|-------------------------|----------------------|
| Paraná            | 2015            | Atlantic Rainforest | Irati                  | <i>Homo sapiens</i>     | 1 female             |
|                   |                 |                     |                        |                         |                      |
|                   | 2016            | Atlantic Rainforest | União da Vitória       | <i>Canis familiaris</i> | 2 females            |
|                   |                 | Atlantic Rainforest | Paula Freitas          | <i>Canis familiaris</i> | 1 female             |
|                   |                 | Atlantic Rainforest | Antônio Olinto         | <i>Canis familiaris</i> | 1 female             |
|                   |                 | Atlantic Rainforest | General Carneiro       | Environment             | 1 female             |
|                   |                 |                     |                        | <i>Canis familiaris</i> | 1 female             |
|                   | 2017            | Atlantic Rainforest | Tijucas do Sul         | <i>Homo sapiens</i>     | 1 male               |
|                   |                 |                     |                        | <i>Canis familiaris</i> | 6 males              |
|                   |                 | Atlantic Rainforest | Paulo Frontin          | <i>Homo sapiens</i>     | 1 female             |
|                   |                 | Atlantic Rainforest | General Carneiro       | Environment             | 1 female             |
|                   |                 |                     |                        | <i>Felis catus</i>      | 1 male               |
|                   |                 | Atlantic Rainforest | Lapa                   | <i>Homo sapiens</i>     | 1 female             |
|                   |                 | Atlantic Rainforest | Araucária              | <i>Canis familiaris</i> | 1 male               |
|                   |                 | Atlantic Rainforest | São Mateus do Sul      | Environment             | 2 females            |
|                   |                 |                     |                        | <i>Canis familiaris</i> | 1 female, 1 male     |
|                   |                 | Atlantic Rainforest | Pinhais                | <i>Canis familiaris</i> | 1 male               |
|                   |                 | Atlantic Rainforest | Bituruna               | <i>Felis catus</i>      | 2 females            |
|                   |                 | Atlantic Rainforest | General Carneiro       | <i>Canis familiaris</i> | 1 female, 1 male     |
|                   |                 | Atlantic Rainforest | União da Vitória       | <i>Canis familiaris</i> | 1 female, 1 male     |
| Santa Catarina    | 2013            | Atlantic Rainforest | Lages                  | <i>Canis familiaris</i> | 3 males              |
|                   |                 | Atlantic Rainforest | Joinville              | <i>Nasua nasua</i>      | 1 male               |
|                   |                 | Atlantic Rainforest | Jacinto Machado        | <i>Canis familiaris</i> | 2 females, 3 males   |
|                   | 2014            | Atlantic Rainforest | Lages                  | <i>Canis familiaris</i> | 2 females, 1 male    |
|                   |                 | Atlantic Rainforest | Balneário Piçarras     | <i>Canis familiaris</i> | 1 male               |
|                   |                 | Atlantic Rainforest | Florianópolis          | <i>Homo sapiens</i>     | 1 male               |
|                   |                 | Atlantic Rainforest | Joinville              | <i>Canis familiaris</i> | 2 females            |
|                   | 2015            | Atlantic Rainforest | Jaraguá do Sul         | <i>Canis familiaris</i> | 1 male               |
|                   |                 | Atlantic Rainforest | Tijucas                | <i>Canis familiaris</i> | 1 male               |
|                   | 2017            | Atlantic Rainforest | Guabiruba              | <i>Canis familiaris</i> | 1 male               |
|                   |                 | Atlantic Rainforest | Brusque                | <i>Homo sapiens</i>     | 1 female, 1 male     |
| Rio Grande do Sul | 2012            | Pampa               | Viamão                 | <i>Canis familiaris</i> | 1 female             |
|                   | 2013            | Atlantic Rainforest | São Francisco de Paula | <i>Canis familiaris</i> | 1 female, 4 males    |
|                   |                 | Atlantic Rainforest | Erechim                | <i>Felis catus</i>      | 1 male               |
|                   | 2014            | Atlantic Rainforest | Canela                 | <i>Canis familiaris</i> | 1 male               |
|                   |                 | Pampa               | Palmares do Sul        | <i>Homo sapiens</i>     | 1 female             |
| Rio de Janeiro    | 2015            | Atlantic Rainforest | Igrejinha              | <i>Canis familiaris</i> | 6 females, 11 males  |
|                   |                 | Atlantic Rainforest | Veranópolis            | <i>Homo sapiens</i>     | 1 male               |
|                   | 2012            | Atlantic Rainforest | Itatiaia               | <i>Canis familiaris</i> | 1 male               |
|                   | 2013            | Atlantic Rainforest | Petrópolis             | <i>Canis familiaris</i> | 6 females            |
|                   |                 |                     |                        | Environment             | 1 female, 2 males    |
| São Paulo         | 2014            | Atlantic Rainforest | Petrópolis             | <i>Canis familiaris</i> | 2 females, 1 male    |
|                   |                 |                     |                        | <i>Felis catus</i>      | 2 females, 2 males   |
| São Paulo         | 2015            | Atlantic Rainforest | Santo André            | <i>Canis familiaris</i> | 24 females, 9 males  |
| TOTAL             |                 |                     |                        |                         | 68 females, 60 males |
|                   |                 |                     |                        |                         | 128 specimens        |
