# Supplementary material for: Amblyomma aureolatum Genetic Diversity and Population Dynamics Are Not Related to Spotted Fever Epidemiological Scenarios in Brazil
Source: MDPI journal article supplement (doi:10.3390/pathogens10091146), 2021-09-06
Supplement: s1 [file s1]

**Table S2.** Distribution and frequency of cytochrome oxidase subunit II haplotypes identified in the populations of *Amblyomma aureolatum* analyzed from Brazil.

| Epidemiological scenario | Populations       | Ns     | Cytochrome oxidase subunit II Haplotypes (487 bp) |      |      |      |      |      |      |      |      |      |      |      |      |      |       |      |      |
|--------------------------|-------------------|--------|---------------------------------------------------|------|------|------|------|------|------|------|------|------|------|------|------|------|-------|------|------|
|                          |                   |        | h1                                                | h2   | h3   | h4   | h5   | h6   | h7   | h8   | h9   | h10  | h11  | h12  | h13  | h14  | h15   | h16  | h17  |
| Group I                  | Paraná            | 16     | 9                                                 |      |      | 2    |      |      |      |      |      |      | 1    | 1    | 1    | 1    | 1     |      |      |
|                          | Santa Catarina    | 13     | 9                                                 | 1    | 1    | 1    |      |      |      |      |      |      |      |      |      |      | 1     |      |      |
|                          | Rio de Janeiro    | 4      |                                                   |      |      |      | 2    |      |      |      |      |      |      |      |      |      | 2     |      |      |
|                          | Rio Grande do Sul | 10     |                                                   |      |      |      |      |      |      | 1    | 1    | 1    |      |      |      | 2    | 3     | 1    | 1    |
| Group II                 | São Paulo         | 15     |                                                   | 1    |      |      |      | 2    | 1    |      |      |      |      |      |      | 2    | 9     |      |      |
|                          | Total             | 58     | 18                                                | 2    | 1    | 3    | 2    | 2    | 1    | 1    | 1    | 1    | 1    | 1    | 1    | 5    | 16    | 1    | 1    |
|                          | Frequency (%)     | 100.00 | 31.04                                             | 3.45 | 1.72 | 5.18 | 3.45 | 3.45 | 1.72 | 1.72 | 1.72 | 1.72 | 1.72 | 1.72 | 1.72 | 8.63 | 27.60 | 1.72 | 1.72 |

Ns = number of sequences; Group I, populations where there is no evidence of *Amblyomma aureolatum* participation in the Brazilian Spotted Fever scenario; Group II, Only population in which *Amblyomma aureolatum* is a proven vector of *Rickettsia rickettsii*.
