# Supplementary material for: Amblyomma aureolatum Genetic Diversity and Population Dynamics Are Not Related to Spotted Fever Epidemiological Scenarios in Brazil
Source: MDPI journal article supplement (doi:10.3390/pathogens10091146), 2021-09-06
Supplement: s1 [file s1]

**Table S4.** Sample data, haplotype and associated GenBank accession numbers for *Amblyomma aureolatum* 12S rDNA, cytochrome oxidase subunit II (COII), D-loop and rickettsia sequences analyzed from Brazil.

| Sample number | Tick sex | Host                    | Year collection | State          | Localities        | Altitude   | Presence of rickettsia (Amplified gene) (GenBank accession number) | 12S rDNA Haplotype (GenBank accession number) | COII Haplotype (GenBank accession numbers) | D-loop Haplotypes (GenBank accession numbers) |
|---------------|----------|-------------------------|-----------------|----------------|-------------------|------------|--------------------------------------------------------------------|-----------------------------------------------|--------------------------------------------|-----------------------------------------------|
| 7402          | Female   | <i>Homo sapiens</i>     | 2015            | Paraná         | Irati             | 836 meters | Negative                                                           | hII (MF175655)                                | h15 (MT578027)                             | hB (MF175681)                                 |
| 8108          | Female   | <i>Canis familiaris</i> | 2016            | Paraná         | União da Vitória  | 752 meters | Negative                                                           | hVI (MT578021)                                | h11 (MT578023)                             | hA (MF175680)                                 |
| 8109          | Female   | <i>Canis familiaris</i> | 2016            | Paraná         | Paula Freitas     | 793 meters | Negative                                                           | hVII (MT578022)                               | -                                          | hM (MT578030)                                 |
| 8181          | Female   | <i>Canis familiaris</i> | 2016            | Paraná         | Antônio Olinto    | 817 meters | Negative                                                           | hI (MF175654)                                 | -                                          | hA (MF175680)                                 |
| 8193          | Female   | <i>Canis familiaris</i> | 2016            | Paraná         | União da Vitória  | 752 meters | Negative                                                           | hI (MF175654)                                 | h12 ( MT578024)                            | hA (MF175680)                                 |
| 8194          | Female   | Environment (House)     | 2016            | Paraná         | General Carneiro  | 983 meters | Negative                                                           | hII (MF175655)                                | h1 (MF175738)                              | hC (MF175682)                                 |
| 8195          | Female   | <i>Canis familiaris</i> | 2016            | Paraná         | General Carneiro  | 983 meters | Negative                                                           | hI (MF175654)                                 | h4 (MF175741)                              | hA (MF175680)                                 |
| 8499          | Male     | <i>Homo sapiens</i>     | 2017            | Paraná         | Tijucas do Sul    | 940 meters | Negative                                                           | hI (MF175654)                                 | h1 (MF175738)                              | hA (MF175680)                                 |
| 8526          | Female   | <i>Homo sapiens</i>     | 2017            | Paraná         | Paulo Frontin     | 778 meters | Negative                                                           | hI (MF175654)                                 | -                                          | hA (MF175680)                                 |
| 8529          | Female   | Environment (House)     | 2017            | Paraná         | General Carneiro  | 983 meters | Negative                                                           | -                                             | -                                          | hA (MF175680)                                 |
| 8530          | Male     | <i>Felis catus</i>      | 2017            | Paraná         | General Carneiro  | 983 meters | Negative                                                           | hII (MF175655)                                | -                                          | -                                             |
| 8533          | Female   | <i>Homo sapiens</i>     | 2017            | Paraná         | Lapa              | 908 meters | Negative                                                           | hII (MF175655)                                | h1 (MF175738)                              | hF (MF175685)                                 |
| 8534          | Male     | <i>Canis familiaris</i> | 2017            | Paraná         | Araucária         | 897 meters | Negative                                                           | -                                             | -                                          | hB (MF175681)                                 |
| 8632          | Female   | Environment (House)     | 2017            | Paraná         | São Mateus do Sul | 761 meters | Negative                                                           | hI (MF175654)                                 | h14 ( MT578026)                            | hA (MF175680)                                 |
| 8637          | Male     | <i>Canis familiaris</i> | 2017            | Paraná         | Pinhais           | 893 meters | Negative                                                           | hI (MF175654)                                 | -                                          | hA (MF175680)                                 |
| 8107A         | Female   | <i>Canis familiaris</i> | 2016            | Paraná         | São Mateus do Sul | 761 meters | Negative                                                           | hII (MF175655)                                | -                                          | hF (MF175685)                                 |
| 8107B         | Male     | <i>Canis familiaris</i> | 2016            | Paraná         | São Mateus do Sul | 761 meters | Negative                                                           | hI (MF175654)                                 | h1 (MF175738)                              | hA (MF175680)                                 |
| 8524A         | Female   | <i>Felis catus</i>      | 2017            | Paraná         | Bituruna          | 900 meters | Negative                                                           | -                                             | h1 (MF175738)                              | hN (MT578031)                                 |
| 8524B         | Female   | <i>Felis catus</i>      | 2017            | Paraná         | Bituruna          | 900 meters | Negative                                                           | -                                             | h1 (MF175738)                              | -                                             |
| 8531A         | Female   | <i>Canis familiaris</i> | 2017            | Paraná         | General Carneiro  | 983 meters | Negative                                                           | hII (MF175655)                                | h13 (MT578025)                             | -                                             |
| 8531B         | Male     | <i>Canis familiaris</i> | 2017            | Paraná         | General Carneiro  | 983 meters | Negative                                                           | hII (MF175655)                                | h1 (MF175738)                              | hA (MF175680)                                 |
| 8547A         | Male     | <i>Canis familiaris</i> | 2017            | Paraná         | Tijucas do Sul    | 940 meters | Negative                                                           | hI (MF175654)                                 | -                                          | -                                             |
| 8547B         | Male     | <i>Canis familiaris</i> | 2017            | Paraná         | Tijucas do Sul    | 940 meters | Negative                                                           | hII (MF175655)                                | -                                          | hA (MF175680)                                 |
| 8548A         | Male     | <i>Canis familiaris</i> | 2017            | Paraná         | Tijucas do Sul    | 940 meters | Negative                                                           | hI (MF175654)                                 | h4 (MF175741)                              | hA (MF175680)                                 |
| 8548B         | Male     | <i>Canis familiaris</i> | 2017            | Paraná         | Tijucas do Sul    | 940 meters | Negative                                                           | hII (MF175655)                                | h1 (MF175738)                              | hB (MF175681)                                 |
| 8548C         | Male     | <i>Canis familiaris</i> | 2017            | Paraná         | Tijucas do Sul    | 940 meters | Negative                                                           | -                                             | -                                          | hA (MF175680)                                 |
| 8548D         | Male     | <i>Canis familiaris</i> | 2017            | Paraná         | Tijucas do Sul    | 940 meters | Negative                                                           | -                                             | h1 (MF175738)                              | -                                             |
| 8645A         | Female   | <i>Canis familiaris</i> | 2017            | Paraná         | União da Vitória  | 752 meters | Negative                                                           | -                                             | -                                          | hC (MF175682)                                 |
| 8645B         | Male     | <i>Canis familiaris</i> | 2017            | Paraná         | União da Vitória  | 752 meters | Negative                                                           | -                                             | -                                          | hA (MF175680)                                 |
| 4724B         | Male     | <i>Canis familiaris</i> | 2013            | Santa Catarina | Lages             | 930 meters | Negative                                                           | hI (MF175654)                                 | h4 (MF175741)                              | hA (MF175680)                                 |
| 4724C         | Male     | <i>Canis familiaris</i> | 2013            | Santa Catarina | Lages             | 930 meters | Negative                                                           | hI (MF175654)                                 | h1 (MF175738)                              | -                                             |
| 4724D         | Male     | <i>Canis familiaris</i> | 2013            | Santa Catarina | Lages             | 930 meters | Negative                                                           | hI (MF175654)                                 | h1 (MF175738)                              | -                                             |

COII, cytochrome oxidase subunit II.

**Table S4.** Sample data, haplotype and associated GenBank accession numbers for *Amblyomma aureolatum* 12S rDNA, cytochrome oxidase subunit II (COII), D-loop and rickettsia sequences analyzed from Brazil (continuation).

| Sample number | Tick sex | Host                    | Year collection | State             | Localities             | Altitude    | Presence of rickettsia (Amplified gene) (GenBank accession number) | 12S rDNA Haplotype (GenBank accession number) | COII Haplotype (GenBank accession numbers) | D-loop Haplotypes (GenBank accession numbers) |
|---------------|----------|-------------------------|-----------------|-------------------|------------------------|-------------|--------------------------------------------------------------------|-----------------------------------------------|--------------------------------------------|-----------------------------------------------|
| 4725D         | Male     | <i>Nasua nasua</i>      | 2013            | Santa Catarina    | Joinville              | 4,5 meters  | Negative                                                           | hl (MF175654)                                 | –                                          | –                                             |
| 4749A         | Female   | <i>Canis familiaris</i> | 2013            | Santa Catarina    | Jacinto Machado        | 28 meters   | Negative<br><i>Rickettsia felis</i><br>(htr A)<br>(MF175788)       | hl (MF175654)                                 | h1 (MF175738)                              | hA (MF175680)                                 |
| 4749B         | Female   | <i>Canis familiaris</i> | 2013            | Santa Catarina    | Jacinto Machado        | 28 meters   | Negative                                                           | hll (MF175655)                                | h1 (MF175738)                              | –                                             |
| 4749E         | Male     | <i>Canis familiaris</i> | 2013            | Santa Catarina    | Jacinto Machado        | 28 meters   | Negative                                                           | hll (MF175655)                                | h3 (MF175740)                              | hA (MF175680)                                 |
| 4749F         | Male     | <i>Canis familiaris</i> | 2013            | Santa Catarina    | Jacinto Machado        | 28 meters   | Negative                                                           | hll (MF175655)                                | h1 (MF175738)                              | hA (MF175680)                                 |
| 4749G         | Male     | <i>Canis familiaris</i> | 2013            | Santa Catarina    | Jacinto Machado        | 28 meters   | Negative                                                           | hll (MF175655)                                | h1 (MF175738)                              | hA (MF175680)                                 |
| 5378          | Female   | <i>Canis familiaris</i> | 2014            | Santa Catarina    | Lages                  | 930 meters  | Negative                                                           | –                                             | –                                          | hA (MF175680)                                 |
| 5379          | Female   | <i>Canis familiaris</i> | 2014            | Santa Catarina    | Lages                  | 930 meters  | Negative                                                           | –                                             | –                                          | hA (MF175680)                                 |
| 6461          | Male     | <i>Canis familiaris</i> | 2014            | Santa Catarina    | Balneário Piçarras     | 18 meters   | Negative                                                           | hll (MF175655)                                | –                                          | hA (MF175680)                                 |
| 6465          | Male     | <i>Homo sapiens</i>     | 2014            | Santa Catarina    | Florianópolis          | 2,74 meters | Negative                                                           | hll (MF175655)                                | –                                          | hA (MF175680)                                 |
| 6480          | Male     | <i>Bos taurus</i>       | 2014            | Santa Catarina    | Lages                  | 930 meters  | Negative                                                           | hl (MF175654)                                 | –                                          | hA (MF175680)                                 |
| 6479A         | Female   | <i>Canis familiaris</i> | 2014            | Santa Catarina    | Joinville              | 4,5 meters  | Negative                                                           | hl (MF175654)                                 | –                                          | hA (MF175680)                                 |
| 6479B         | Female   | <i>Canis familiaris</i> | 2014            | Santa Catarina    | Joinville              | 4,5 meters  | Negative                                                           | hll (MF175655)                                | –                                          | hD (MF175683)                                 |
| 7021A         | Male     | <i>Canis familiaris</i> | 2015            | Santa Catarina    | Jaraguá do Sul         | 30 meters   | Negative                                                           | hll (MF175655)                                | h15 (MT578027)                             | hC (MF175682)                                 |
| 7380A         | Male     | <i>Canis familiaris</i> | 2015            | Santa Catarina    | Tijucas                | 2 meters    | Negative                                                           | hl (MF175654)                                 | h2 (MF175739)                              | hB (MF175681)                                 |
| 8571D         | Male     | <i>Canis familiaris</i> | 2017            | Santa Catarina    | Guabiruba              | 60 meters   | Negative                                                           | hl (MF175654)                                 | h1 (MF175738)                              | hA (MF175680)                                 |
| 8572B         | Female   | <i>Homo sapiens</i>     | 2017            | Santa Catarina    | Brusque                | 21 meters   | Negative                                                           | hll (MF175655)                                | h1 (MF175738)                              | hA (MF175680)                                 |
| 8572C         | Male     | <i>Homo sapiens</i>     | 2017            | Santa Catarina    | Brusque                | 21 meters   | Negative                                                           | hll (MF175655)                                | h1 (MF175738)                              | hA (MF175680)                                 |
| 4207A         | Female   | <i>Canis familiaris</i> | 2012            | Rio Grande do Sul | Viamão                 | 9 meters    | Negative                                                           | hIV (MF175657)                                | –                                          | –                                             |
| 5526A         | Female   | <i>Canis familiaris</i> | 2013            | Rio Grande do Sul | São Francisco de Paula | 889 meters  | Negative                                                           | –                                             | –                                          | hA (MF175680)                                 |
| 5526B         | Male     | <i>Canis familiaris</i> | 2013            | Rio Grande do Sul | São Francisco de Paula | 889 meters  | Negative                                                           | –                                             | –                                          | hA (MF175680)                                 |
| 5526C         | Male     | <i>Canis familiaris</i> | 2013            | Rio Grande do Sul | São Francisco de Paula | 931 meters  | Negative                                                           | hV (MF175658)                                 | –                                          | hK (MF175690)                                 |
| 5526D         | Male     | <i>Canis familiaris</i> | 2013            | Rio Grande do Sul | São Francisco de Paula | 889 meters  | Negative                                                           | hl (MF175654)                                 | h15 (MT578027)                             | hA (MF175680)                                 |
| 5526E         | Male     | <i>Canis familiaris</i> | 2013            | Rio Grande do Sul | São Francisco de Paula | 889 meters  | Negative                                                           | hl (MF175654)                                 | h15 (MT578027)                             | hL (MF175691)                                 |
| 5527          | Male     | <i>Felis catus</i>      | 2013            | Rio Grande do Sul | Erechim                | 783 meters  | Negative                                                           | hll (MF175655)                                | –                                          | hA (MF175680)                                 |
| 5556          | Male     | <i>Canis familiaris</i> | 2014            | Rio Grande do Sul | Canela                 | 837 meters  | Negative                                                           | hll (MF175656)                                | h8 (MF175745)                              | hA (MF175680)                                 |
| 6897A         | Female   | <i>Canis familiaris</i> | 2015            | Rio Grande do Sul | Igrejinha              | 18 meters   | Negative                                                           | hl (MF175654)                                 | –                                          | hA (MF175680)                                 |
| 6897B         | Female   | <i>Canis familiaris</i> | 2015            | Rio Grande do Sul | Igrejinha              | 18 meters   | Negative                                                           | hll (MF175655)                                | –                                          | hA (MF175680)                                 |
| 6897D         | Female   | <i>Canis familiaris</i> | 2015            | Rio Grande do Sul | Igrejinha              | 18 meters   | Negative                                                           | hV (MF175658)                                 | –                                          | hK (MF175690)                                 |
| 6897E         | Female   | <i>Canis familiaris</i> | 2015            | Rio Grande do Sul | Igrejinha              | 18 meters   | Negative                                                           | hll (MF175655)                                | –                                          | hA (MF175680)                                 |
| 6897F         | Female   | <i>Canis familiaris</i> | 2015            | Rio Grande do Sul | Igrejinha              | 18 meters   | Negative                                                           | hIV (MF175657)                                | h9 (MF175746)                              | hA (MF175680)                                 |
| 6897G         | Male     | <i>Canis familiaris</i> | 2015            | Rio Grande do Sul | Igrejinha              | 18 meters   | Negative                                                           | –                                             | –                                          | hK (MF175690)                                 |

COII, cytochrome oxidase subunit II.

**Table S4.** Sample data, haplotype and associated GenBank accession numbers for *Amblyomma aureolatum* 12S rDNA, cytochrome oxidase subunit II (COII), D-loop and rickettsia sequences analyzed from Brazil (continuation).

| Sample number | Tick sex | Host                    | Year collection | State             | Localities      | Altitude     | Presence of rickettsia (Amplified gene) (GenBank accession number) | 12S rDNA Haplotype (GenBank accession number) | COII Haplotype (GenBank accession numbers) | D-loop Haplotypes (GenBank accession numbers) |
|---------------|----------|-------------------------|-----------------|-------------------|-----------------|--------------|--------------------------------------------------------------------|-----------------------------------------------|--------------------------------------------|-----------------------------------------------|
| 6897H         | Male     | <i>Canis familiaris</i> | 2015            | Rio Grande do Sul | Igrejinha       | 18 meters    | Negative                                                           | hI (MF175654)                                 | h17 (MT578029)                             | hA (MF175680)                                 |
| 6897I         | Male     | <i>Canis familiaris</i> | 2015            | Rio Grande do Sul | Igrejinha       | 18 meters    | Negative                                                           | -                                             | -                                          | hK (MF175690)                                 |
| 6897K         | Male     | <i>Canis familiaris</i> | 2015            | Rio Grande do Sul | Igrejinha       | 18 meters    | Negative                                                           | hI (MF175654)                                 | h14 (MT578026)                             | hA (MF175680)                                 |
| 6897L         | Male     | <i>Canis familiaris</i> | 2015            | Rio Grande do Sul | Igrejinha       | 18 meters    | Negative                                                           | -                                             | h10 (MF175747)                             | hK (MF175690)                                 |
| 6897M         | Male     | <i>Canis familiaris</i> | 2015            | Rio Grande do Sul | Igrejinha       | 18 meters    | Negative                                                           | hII (MF175655)                                | h14 (MT578026)                             | hA (MF175680)                                 |
| 6897N         | Male     | <i>Canis familiaris</i> | 2015            | Rio Grande do Sul | Igrejinha       | 18 meters    | Negative                                                           | -                                             | -                                          | hK (MF175690)                                 |
| 6897O         | Male     | <i>Canis familiaris</i> | 2015            | Rio Grande do Sul | Igrejinha       | 18 meters    | Negative                                                           | -                                             | -                                          | hK (MF175690)                                 |
| 6897P         | Male     | <i>Canis familiaris</i> | 2015            | Rio Grande do Sul | Igrejinha       | 18 meters    | Negative                                                           | -                                             | -                                          | hA (MF175680)                                 |
| 6897Q         | Male     | <i>Canis familiaris</i> | 2015            | Rio Grande do Sul | Igrejinha       | 18 meters    | Negative                                                           | hV (MF175658)                                 | -                                          | hK (MF175690)                                 |
| 6898B         | Male     | <i>Canis familiaris</i> | 2015            | Rio Grande do Sul | Igrejinha       | 18 meters    | Negative                                                           | hII (MF175655)                                | h15 (MT578027)                             | hA (MF175680)                                 |
| 6899          | Female   | <i>Canis familiaris</i> | 2015            | Rio Grande do Sul | Igrejinha       | 18 meters    | Negative                                                           | -                                             | -                                          | hA (MF175680)                                 |
| 8123          | Female   | <i>Homo sapiens</i>     | 2014            | Rio Grande do Sul | Palmares do Sul | 10 meters    | Negative                                                           | -                                             | -                                          | hL (MF175691)                                 |
| 8127          | Male     | <i>Homo sapiens</i>     | 2015            | Rio Grande do Sul | Veranópolis     | 705 meters   | Negative                                                           | hI (MF175654)                                 | h16 (MT578028)                             | hA (MF175680)                                 |
| 4201B         | Male     | <i>Canis familiaris</i> | 2012            | Rio de Janeiro    | Itatiaia        | 1,648 meters | Negative                                                           | -                                             | h15 (MT578027)                             | hB (MF175681)                                 |
| 4928          | Female   | <i>Canis familiaris</i> | 2013            | Rio de Janeiro    | Petrópolis      | 838 meters   | Negative                                                           | hII (MF175655)                                | -                                          | hA (MF175680)                                 |
| 4929          | Female   | <i>Canis familiaris</i> | 2013            | Rio de Janeiro    | Petrópolis      | 838 meters   | Negative                                                           | -                                             | -                                          | hA (MF175680)                                 |
| 4930          | Female   | <i>Canis familiaris</i> | 2013            | Rio de Janeiro    | Petrópolis      | 838 meters   | Negative                                                           | hII (MF175655)                                | -                                          | -                                             |
| 4931          | Female   | <i>Canis familiaris</i> | 2013            | Rio de Janeiro    | Petrópolis      | 838 meters   | Negative                                                           | -                                             | -                                          | hE (MF175684)                                 |
| 4933          | Female   | <i>Canis familiaris</i> | 2013            | Rio de Janeiro    | Petrópolis      | 838 meters   | Negative                                                           | hII (MF175655)                                | -                                          | hA (MF175680)                                 |
| 4936B         | Female   | Environment             | 2013            | Rio de Janeiro    | Petrópolis      | 838 meters   | Negative                                                           | -                                             | -                                          | hA (MF175680)                                 |
| 4936C         | Male     | Environment             | 2013            | Rio de Janeiro    | Petrópolis      | 838 meters   | Negative                                                           | -                                             | h5 (MF175742)                              | hA (MF175680)                                 |
| 4936D         | Male     | Environment             | 2013            | Rio de Janeiro    | Petrópolis      | 838 meters   | Negative                                                           | -                                             | h5 (MF175742)                              | hA (MF175680)                                 |
| 5258          | Female   | <i>Canis familiaris</i> | 2013            | Rio de Janeiro    | Petrópolis      | 838 meters   | Negative                                                           | hII (MF175655)                                | -                                          | hA (MF175680)                                 |
| 5773A         | Male     | <i>Canis familiaris</i> | 2014            | Rio de Janeiro    | Petrópolis      | 838 meters   | Negative                                                           | -                                             | h15 (MT578027)                             | hA (MF175680)                                 |
| 5773B         | Female   | <i>Canis familiaris</i> | 2014            | Rio de Janeiro    | Petrópolis      | 838 meters   | Negative                                                           | -                                             | -                                          | hB (MF175681)                                 |
| 6234          | Male     | <i>Felis catus</i>      | 2014            | Rio de Janeiro    | Petrópolis      | 838 meters   | Negative                                                           | -                                             | -                                          | hA (MF175680)                                 |
| 6235          | Female   | <i>Felis catus</i>      | 2014            | Rio de Janeiro    | Petrópolis      | 838 meters   | Negative                                                           | -                                             | -                                          | hA (MF175680)                                 |
| 6236          | Female   | <i>Canis familiaris</i> | 2014            | Rio de Janeiro    | Petrópolis      | 838 meters   | Negative                                                           | -                                             | -                                          | hF (MF175685)                                 |
| 6237          | Male     | <i>Felis catus</i>      | 2014            | Rio de Janeiro    | Petrópolis      | 838 meters   | Negative                                                           | -                                             | -                                          | hB (MF175681)                                 |
| 6239          | Female   | <i>Felis catus</i>      | 2014            | Rio de Janeiro    | Petrópolis      | 838 meters   | Negative                                                           | -                                             | -                                          | hA (MF175680)                                 |

COII, cytochrome oxidase subunit II.

**Table S4.** Sample data, haplotype and associated GenBank accession numbers for *Amblyomma aureolatum* 12S rDNA, cytochrome oxidase subunit II (COII), D-loop and rickettsia sequences analyzed from Brazil (continuation).

| Sample number | Tick sex | Host                    | Year collection | State     | Localities  | Altitude   | Presence of rickettsia (Amplified gene) (GenBank accession number) | 12S rDNA Haplotype (GenBank accession number) | COII Haplotype (GenBank accession numbers) | D-loop Haplotypes (GenBank accession numbers) |
|---------------|----------|-------------------------|-----------------|-----------|-------------|------------|--------------------------------------------------------------------|-----------------------------------------------|--------------------------------------------|-----------------------------------------------|
| 6249A         | Male     | <i>Canis familiaris</i> | 2015            | São Paulo | Santo André | 760 meters | Negative                                                           | hl (MF175654)                                 | h14 (MT578026)                             | hl (MF175688)                                 |
| 6249B         | Male     | <i>Canis familiaris</i> | 2015            | São Paulo | Santo André | 760 meters | Negative                                                           | hl (MF175654)                                 | –                                          | hA (MF175680)                                 |
| 6249B1        | Female   | <i>Canis familiaris</i> | 2015            | São Paulo | Santo André | 760 meters | Negative                                                           | hl (MF175654)                                 | –                                          | hA (MF175680)                                 |
| 6249C         | Male     | <i>Canis familiaris</i> | 2015            | São Paulo | Santo André | 760 meters | Negative                                                           | –                                             | h15 (MT578027)                             | hA (MF175680)                                 |
| 6249C1        | Female   | <i>Canis familiaris</i> | 2015            | São Paulo | Santo André | 760 meters | Negative                                                           | –                                             | –                                          | hA (MF175680)                                 |
| 6249D         | Male     | <i>Canis familiaris</i> | 2015            | São Paulo | Santo André | 760 meters | Negative                                                           | hll (MF175655)                                | h6 (MF175743)                              | hA (MF175680)                                 |
| 6249E         | Male     | <i>Canis familiaris</i> | 2015            | São Paulo | Santo André | 760 meters | Negative                                                           | hl (MF175654)                                 | h15 (MT578027)                             | hH (MF175687)                                 |
| 6249E1        | Female   | <i>Canis familiaris</i> | 2015            | São Paulo | Santo André | 760 meters | Negative                                                           | –                                             | –                                          | hA (MF175680)                                 |
| 6249F         | Male     | <i>Canis familiaris</i> | 2015            | São Paulo | Santo André | 760 meters | Negative                                                           | hl (MF175654)                                 | h15 (MT578027)                             | hl (MF175688)                                 |
| 6249F1        | Female   | <i>Canis familiaris</i> | 2015            | São Paulo | Santo André | 760 meters | Negative                                                           | hl (MF175654)                                 | –                                          | –                                             |
| 6249G         | Male     | <i>Canis familiaris</i> | 2015            | São Paulo | Santo André | 760 meters | Negative                                                           | hl (MF175654)                                 | h6 (MF175743)                              | hA (MF175680)                                 |
| 6249H         | Male     | <i>Canis familiaris</i> | 2015            | São Paulo | Santo André | 760 meters | <i>Rickettsia bellii</i> (glt A, htr A) (MF175769/ MF175786)       | hll (MF175655)                                | h15 (MT578027)                             | hA (MF175680)                                 |
| 6249I         | Male     | <i>Canis familiaris</i> | 2015            | São Paulo | Santo André | 760 meters | Negative                                                           | hll (MF175655)                                | h15 (MT578027)                             | hA (MF175680)                                 |
| 6249I1        | Female   | <i>Canis familiaris</i> | 2015            | São Paulo | Santo André | 760 meters | <i>Rickettsia bellii</i> (glt A) (MF175772)                        | hl (MF175654)                                 | –                                          | hA (MF175680)                                 |
| 6249J         | Male     | <i>Canis familiaris</i> | 2015            | São Paulo | Santo André | 760 meters | Negative                                                           | –                                             | –                                          | hA (MF175680)                                 |
| 6249J1        | Female   | <i>Canis familiaris</i> | 2015            | São Paulo | Santo André | 760 meters | Negative                                                           | hll (MF175655)                                | –                                          | –                                             |
| 6249K         | Female   | <i>Canis familiaris</i> | 2015            | São Paulo | Santo André | 760 meters | <i>Rickettsia bellii</i> (glt A) (MF175770)                        | hll (MF175655)                                | h15 (MT578027)                             | hB (MF175681)                                 |
| 6249K1        | Female   | <i>Canis familiaris</i> | 2015            | São Paulo | Santo André | 760 meters | Negative                                                           | hll (MF175655)                                | –                                          | hG (MF175686)                                 |
| 6249L         | Female   | <i>Canis familiaris</i> | 2015            | São Paulo | Santo André | 760 meters | Negative                                                           | hl (MF175654)                                 | h2 (MF175739)                              | hA (MF175680)                                 |
| 6249L1        | Female   | <i>Canis familiaris</i> | 2015            | São Paulo | Santo André | 760 meters | Negative                                                           | hl (MF175654)                                 | –                                          | hA (MF175680)                                 |
| 6249M         | Female   | <i>Canis familiaris</i> | 2015            | São Paulo | Santo André | 760 meters | Negative                                                           | hl (MF175654)                                 | –                                          | –                                             |
| 6249M1        | Female   | <i>Canis familiaris</i> | 2015            | São Paulo | Santo André | 760 meters | Negative                                                           | hll (MF175655)                                | –                                          | –                                             |
| 6249N         | Female   | <i>Canis familiaris</i> | 2015            | São Paulo | Santo André | 760 meters | Negative                                                           | hl (MF175654)                                 | –                                          | –                                             |
| 6249P         | Female   | <i>Canis familiaris</i> | 2015            | São Paulo | Santo André | 760 meters | Negative                                                           | hl (MF175654)                                 | h15 (MT578027)                             | hA (MF175680)                                 |
| 6249P1        | Female   | <i>Canis familiaris</i> | 2015            | São Paulo | Santo André | 760 meters | Negative                                                           | hl (MF175654)                                 | –                                          | hA (MF175680)                                 |
| 6249Q         | Female   | <i>Canis familiaris</i> | 2015            | São Paulo | Santo André | 760 meters | Negative                                                           | hl (MF175654)                                 | h7 (MF175744)                              | hJ (MF175689)                                 |
| 6249Q1        | Female   | <i>Canis familiaris</i> | 2015            | São Paulo | Santo André | 760 meters | Negative                                                           | hll (MF175655)                                | –                                          | hA (MF175680)                                 |
| 6249R         | Female   | <i>Canis familiaris</i> | 2015            | São Paulo | Santo André | 760 meters | <i>Rickettsia bellii</i> (glt A, htr A) (MF175771/ MF175787)       | hl (MF175654)                                 | h14 (MT578026)                             | hA (MF175680)                                 |
| 6249R1        | Female   | <i>Canis familiaris</i> | 2015            | São Paulo | Santo André | 760 meters | Negative                                                           | hl (MF175654)                                 | –                                          | –                                             |
| 6249S         | Female   | <i>Canis familiaris</i> | 2015            | São Paulo | Santo André | 760 meters | Negative                                                           | hl (MF175654)                                 | –                                          | hA (MF175680)                                 |
| 6249T         | Female   | <i>Canis familiaris</i> | 2015            | São Paulo | Santo André | 760 meters | Negative                                                           | hl (MF175654)                                 | h15 (MT578027)                             | hA (MF175680)                                 |
| 6249T1        | Female   | <i>Canis familiaris</i> | 2015            | São Paulo | Santo André | 760 meters | Negative                                                           | hl (MF175654)                                 | –                                          | hA (MF175680)                                 |
| 6249U1        | Female   | <i>Canis familiaris</i> | 2015            | São Paulo | Santo André | 760 meters | Negative                                                           | hl (MF175654)                                 | –                                          | hA (MF175680)                                 |
| 6249V         | Female   | <i>Canis familiaris</i> | 2015            | São Paulo | Santo André | 760 meters | Negative                                                           | –                                             | h15 (MT578027)                             | –                                             |

COII, cytochrome oxidase subunit II.
