# Supplementary material for: Amblyomma aureolatum Genetic Diversity and Population Dynamics Are Not Related to Spotted Fever Epidemiological Scenarios in Brazil
Source: MDPI journal article supplement (doi:10.3390/pathogens10091146), 2021-09-06
Supplement: s1 [file s1]

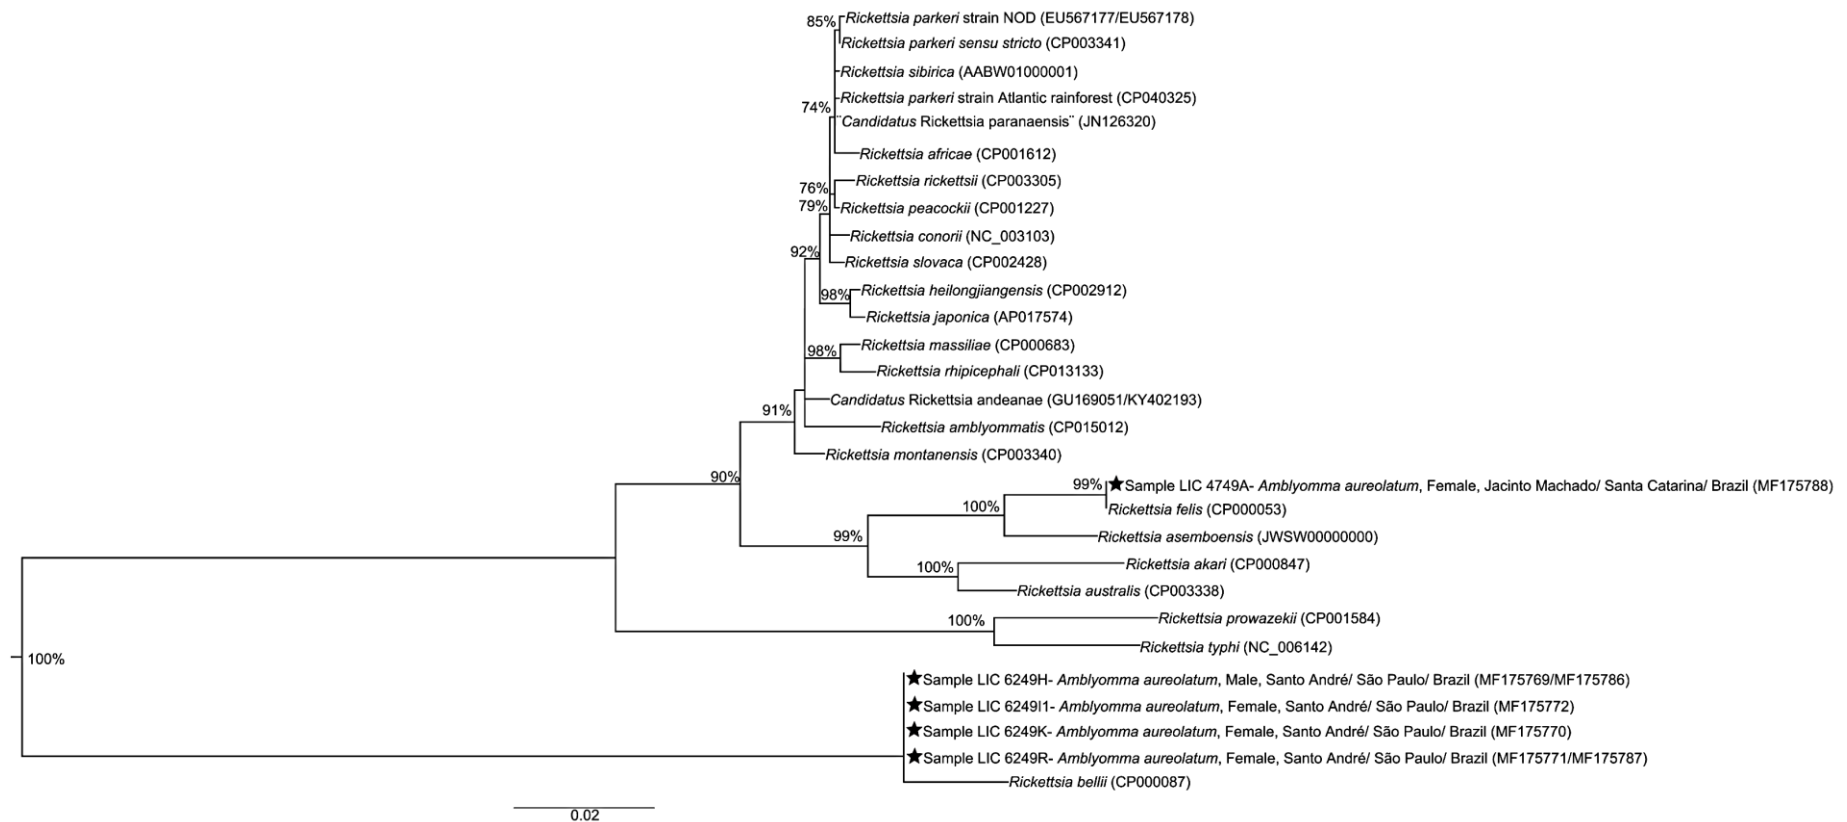

**Figure S1.** Concatenated phylogeny of rickettsia *gltA* and *htrA* genes fragment (1013+ 370 bp) detected in *Amblyomma aureolatum* in Brazil, inferred by Maximum Likelihood analysis with evolution model GTR+G. Numbers on the branches represent support values (70% cut-off).
