# Supplementary material for: Amblyomma aureolatum Genetic Diversity and Population Dynamics Are Not Related to Spotted Fever Epidemiological Scenarios in Brazil
Source: MDPI journal article supplement (doi:10.3390/pathogens10091146), 2021-09-06
Supplement: s1 [file s1]

**Table S1.** Distribution and frequency of 12S rDNA haplotypes identified in the populations of *Amblyomma aureolatum* analyzed from Brazil.

| Epidemiological scenario | Populations       | Ns     | 12S rDNA Haplotypes (371 bp) |       |      |      |      |      |      |
|--------------------------|-------------------|--------|------------------------------|-------|------|------|------|------|------|
|                          |                   |        | hI                           | hII   | hIII | hIV  | hV   | hVI  | hVII |
| Group I                  | Paraná            | 21     | 10                           | 9     |      |      |      | 1    | 1    |
|                          | Santa Catarina    | 19     | 9                            | 10    |      |      |      |      |      |
|                          | Rio de Janeiro    | 4      |                              | 4     |      |      |      |      |      |
|                          | Rio Grande do Sul | 17     | 6                            | 5     | 1    | 2    | 3    |      |      |
| Group II                 | São Paulo         | 29     | 21                           | 8     |      |      |      |      |      |
|                          | Total             | 90     | 46                           | 36    | 1    | 2    | 3    | 1    | 1    |
|                          | Frequency (%)     | 100.00 | 51.12                        | 40.00 | 1.11 | 2.22 | 3.33 | 1.11 | 1.11 |

Ns = number of sequences; Group I, populations where there is no evidence of *Amblyomma aureolatum* participation in the Brazilian Spotted Fever scenario; Group II, Only population in which *Amblyomma aureolatum* is a proven vector of *Rickettsia rickettsii*.
