# Supplementary material for: Amblyomma aureolatum Genetic Diversity and Population Dynamics Are Not Related to Spotted Fever Epidemiological Scenarios in Brazil
Source: MDPI journal article supplement (doi:10.3390/pathogens10091146), 2021-09-06
Supplement: s1 [file s1]

**Table S3.** Distribution and frequency of D-loop haplotypes identified in the populations of *Amblyomma aureolatum* analyzed from Brazil.

| Epidemiological scenario | Populations       | Ns     | D-loop Haplotypes (458 bp) |      |      |      |      |      |      |      |      |      |      |      |      |      |
|--------------------------|-------------------|--------|----------------------------|------|------|------|------|------|------|------|------|------|------|------|------|------|
|                          |                   |        | hA                         | hB   | hC   | hD   | hE   | hF   | hG   | hH   | hI   | hJ   | hK   | hL   | hM   | hN   |
| Group I                  | Paraná            | 24     | 15                         | 3    | 2    |      |      | 2    |      |      |      |      |      |      | 1    | 1    |
|                          | Santa Catarina    | 17     | 14                         | 1    | 1    | 1    |      |      |      |      |      |      |      |      |      |      |
|                          | Rio de Janeiro    | 16     | 11                         | 3    |      |      | 1    | 1    |      |      |      |      |      |      |      |      |
|                          | Rio Grande do Sul | 26     | 16                         |      |      |      |      |      |      |      |      |      | 8    | 2    |      |      |
| Group II                 | São Paulo         | 27     | 21                         | 1    |      |      |      |      | 1    | 1    | 2    | 1    |      |      |      |      |
| Total                    |                   | 110    | 77                         | 8    | 3    | 1    | 1    | 3    | 1    | 1    | 2    | 1    | 8    | 2    | 1    | 1    |
| Frequency (%)            |                   | 100.00 | 70.01                      | 7.27 | 2.73 | 0.91 | 0.91 | 2.73 | 0.91 | 0.91 | 1.81 | 0.91 | 7.27 | 1.81 | 0.91 | 0.91 |

Ns = number of sequences; Group I, populations where there is no evidence of *Amblyomma aureolatum* participation in the Brazilian Spotted Fever scenario; Group II, Only population in which *Amblyomma aureolatum* is a proven vector of *Rickettsia rickettsii*.
